# Supplementary material for: Microbial community and antibiotic resistance profiles of biomass and effluent are distinctly affected by antibiotic addition to an anaerobic membrane bioreactor
Source: Royal Society of Chemistry journal article supplement (doi:10.1039/c9ew00913b), 2019-12-23
Supplement: c9ew00913b1.pdf [file c9ew00913b1.pdf]

## Electronic Supplementary Information

### **Microbial community and antibiotic resistance profiles of biomass and effluent are distinctly affected by antibiotic addition to an anaerobic membrane bioreactor**

Ali Zarei-Baygi\*, Moustapha Harb#\*, Phillip Wang\*, Lauren Stadler^, and Adam L. Smith\*†

\* Astani Department of Civil and Environmental Engineering, University of Southern California, 3620 South Vermont Avenue, Los Angeles, CA 90089, USA

# Department of Civil and Environmental Engineering, Lebanese American University, 309 Bassil Building, Byblos, Lebanon

^ Department of Civil and Environmental Engineering, Rice University, 6100 Main Street, Houston, TX 77005, USA

†Corresponding author (Adam L. Smith)

Phone: +1 213.740.0473

Email: [smithada@usc.edu](mailto:smithada@usc.edu)

Number of pages: 15

Number of figures: 6

Number of tables: 6

## Quantification of antibiotics by LC-MS

For antibiotics quantification, 10 mL samples were collected for each sampling time point from the influent and effluent of the AnMBR. Both collected samples and standard solutions were filtered through 0.2 µm PTFE syringe filters (Whatman) using 10 mL syringes with Luer lock tips and stored in certified 2 mL amber LC vials (Agilent) at 4 °C refrigerator for no more than 3 days prior to analysis. Stock solutions of sulfamethoxazole and erythromycin were prepared in HPLC-grade methanol at concentrations of 20 mg/L and stored at -20 °C. Ampicillin stock solution was prepared in HPLC-grade water at 4 mg/L due to its lack of solubility in methanol and stored at 4 °C. For each antibiotic, a six-point standard calibration curve was constructed within the appropriate range (i.e., 0.1-30 µg/L to target effluent antibiotics and 30-400 µg/L to target influent antibiotics). All calibration curve  $R^2$  values were above 0.99. Both solvent-based and matrix-matched calibration curves were generated for all three compounds to ensure that the solvent based standards were representative of influent and effluent concentrations.

Positive ESI MS-Q-TOF mode was employed to target sulfamethoxazole, erythromycin, and ampicillin. The LC gradient program for detection of all three compounds utilized 0.1% formic acid in water as mobile phase A and acetonitrile as mobile phase B as follows: t=0.0 min A=90% B=10%, t=3.0 min A=0% B=100%, t=5.0 min A=0% B=100%, t=5.10 min A=90% B=10%. LC conditions used included a flow rate of 0.4 mL/min, maximum pressure of 600 bar, column temperature of 40 °C, and autosampler tray temperature of 8 °C. A post-column switch was used to divert the first 0.5 min of column elution to waste to avoid sending hydrophilic compounds from the effluent matrix through the MS. Injection volumes ranged from 0.5-10 µL, depending on the target sample range (influent and effluent) for each operational phase, to ensure that no compound extracted ion chromatogram peaks exceeded saturation detection values. MS conditions used were as follows: sheath gas temp. of 400 °C, sheath gas flow rate of 12 L/min, gas temperature of 225 °C, drying gas flow rate of 5 L/min, nebulizer pressure of 20 psi, capillary voltage of 3500V, nozzle voltage of 500V, acquisition rate of 1.5 spectra/s, and acquisition time of 667 ms/spectrum. Targeted compound acquisition parameters are provided in Table S1. All compound detection and quantification analyses were performed using the Agilent MassHunter Qualitative Analysis Navigator program.

**Table S1.** Targeted antibiotic properties and MS data acquisition parameters.

| Compound         | Molecular Weight (MW) | Retention Time (min) | MS Spectrum (m/z) | Fragmentor Voltage (V) |
|------------------|-----------------------|----------------------|-------------------|------------------------|
| Sulfamethoxazole | 253.052               | 2.17                 | 254.059           | 400                    |
| Erythromycin     | 733.461               | 2.35                 | 734.469           | 100                    |
| Ampicillin       | 349.110               | 1.44                 | 350.117           | 400                    |

**Table S2.** Synthetic wastewater composition.

| Concentrate solution |                      | Dilution water      |                      |
|----------------------|----------------------|---------------------|----------------------|
| Reagent              | Concentration (mg/L) | Reagent             | Concentration (mg/L) |
| Ammonium Chloride    | 11.5                 | Sodium Bicarbonate  | 369                  |
| Calcium Chloride     | 11.5                 | Magnesium Phosphate | 30.8                 |
| Iron Sulfate         | 7.7                  | Potassium Phosphate | 13.8                 |
| Sodium Sulfate       | 11.5                 | Sodium Hydroxide    | 18.5                 |
| Sodium Acetate       | 27                   |                     |                      |
| Urea                 | 87                   |                     |                      |
| Peptone              | 11.5                 |                     |                      |
| Yeast                | 46                   |                     |                      |
| Milk Powder          | 115.4                |                     |                      |
| Soy Oil              | 13.5                 |                     |                      |
| Hydrochloric Acid    | 0.2                  |                     |                      |
| Starch               | 115.4                |                     |                      |
| Chromium Nitrate     | 3.7                  |                     |                      |
| Copper Chloride      | 2.5                  |                     |                      |
| Manganese Sulfate    | 4.9                  |                     |                      |
| Nickel Sulfate       | 1.2                  |                     |                      |
| Lead Chloride        | 0.5                  |                     |                      |
| Zinc Chloride        | 1.2                  |                     |                      |

**Table S3.** Forward and reverse primers and qPCR thermocycling conditions of all ARGs, *intl1*, and *rpoB* gene.

| Gene         | Primers                                                | Preincubation | Amplification                                       | Melting                                 | Amplification size (bp) | Detection limit (gene copy/mL) | Ref. |
|--------------|--------------------------------------------------------|---------------|-----------------------------------------------------|-----------------------------------------|-------------------------|--------------------------------|------|
| <b>ermF</b>  | F- CGACACAGCTTTGGTTGAAC<br>R- GGACCTACCTCATAGACAAG     | 95° for 900 s | 40 cycles, 95° for 30 s, 56° for 60 s, 70° for 60   | 95° for 10 s, 65° for 60 s, 97° for 1 s | 309                     | 350                            | 1    |
| <b>ermB</b>  | F- GATACCGTTTACGAAATTGG<br>R-GAATCGAGACTTGAGTGTGC      | 95° for 300 s | 45 cycles, 95° for 30 s, 58° for 30 s, 72° for 30 s | 95° for 10 s, 65° for 60 s, 97° for 1 s | 364                     | 1701                           | 1    |
| <b>sul1</b>  | F- CGCACCGGAAACATCGTGCAC<br>R- TGAAGTTCCGCCCAAGGCTCG   | 95° for 300 s | 40 cycles, 95° for 15 s, 58° for 30 s, 72° for 30 s | 95° for 10 s, 65° for 60 s, 97° for 1 s | 163                     | 155                            | 2    |
| <b>sul2</b>  | F- TCCGGTGGAGGCCGGTATCTGG<br>R- CGGGAATGCCATCTGCCTTGAG | 95° for 900 s | 50 cycles, 95° for 15 s, 58° for 30 s, 72° for 30 s | 95° for 10 s, 65° for 60 s, 97° for 1 s | 191                     | 821                            | 2    |
| <b>intl1</b> | F- CTGGATTTGATCACGGCACG<br>R- ACATGCGTGTAATCATCGTCCG   | 95° for 900 s | 45 cycles, 95° for 30 s, 60° for 60 s               | 95° for 10 s, 65° for 60 s, 97° for 1 s | 196                     | 159                            | 3    |
| <b>oxa-1</b> | F- TATCTACAGCAGCGCCAGTG<br>R- CGCATCAAATGCCATAAGTG     | 94° for 180 s | 40 cycles, 94° for 30 s, 60° for 30 s, 72° for 60 s |                                         | 199                     | 12100                          | 4    |
| <b>ampC</b>  | F- CCTCTTGCTCCACATTTGCT<br>R- ACAACGTTTGCTGTGTGACG     | 95° for 300 s | 45 cycles, 95° for 45 s, 58° for 45 s, 72° for 60 s | 95° for 10 s, 65° for 60 s, 97° for 1 s | 189                     | 670                            | 5    |
| <b>tetO</b>  | F- ACGGARAGTTTATTGTATACC<br>R- TGGCGTATCTATAATGTTGAC   | 95° for 600 s | 40 cycles, 95° for 15 s, 50° for 30 s, 72° for 30 s | 95° for 10 s, 65° for 60 s, 97° for 1 s | 171                     | 2010                           | 6    |
| <b>tetW</b>  | F- GAGAGCCTGCTATATGCCAGC<br>R- GGGCGTATCCACAATGTTAAC   | 94° for 300 s | 40 cycles, 94° for 30 s, 64° for 30 s, 72° for 30 s | 95° for 10 s, 65° for 60 s, 97° for 1 s | 168                     | 1030                           | 6    |
| <b>rpoB</b>  | F- AACATCGGTTTGTATCAAC<br>R- CGTTGCATGTTGGTACCCAT      | 95° for 300 s | 40 cycles, 95° for 30 s, 55° for 30 s, 72° for 30 s | 95° for 10 s, 65° for 60 s, 97° for 1 s | 381                     | 5430                           | 7    |

**Table S4.** Biomass ARG abundances (Copy/*rpoB*) in the pre-antibiotics, antibiotics loading, and post-antibiotics periods. Abundance and errors respectively represent the mean values and standard deviations calculated from triplicate qPCR results.

| Day | <i>ermF</i>       | <i>ermB</i>       | <i>sul1</i>       | <i>sul2</i>       | <i>int11</i>      | <i>oxa-1</i>      | <i>ampC</i>       | <i>tetO</i>        | <i>tetW</i>       |
|-----|-------------------|-------------------|-------------------|-------------------|-------------------|-------------------|-------------------|--------------------|-------------------|
| 1   | 2.74 ±0.66<br>6 9 | 0.45 ±0.01<br>3 8 | 5.369 ±0.130      | 0.22 ±0.01<br>1 9 | 0.35 ±0.03<br>4 6 | 0.22 ±0.03<br>1 9 | 0.00 ±0.00<br>6 1 | 3.647 ±0.13<br>6   | 0.05 ±0.00<br>6 7 |
| 6   | 2.65 ±0.50<br>1 8 | 0.52 ±0.01<br>4 0 | 5.298 ±0.284      | 0.18 ±0.00<br>3 6 | 0.84 ±0.01<br>0 0 | 0.27 ±0.01<br>6 0 | 0.01 ±0.00<br>0 1 | 3.292 ±0.16<br>1   | 0.28 ±0.11<br>0 5 |
| 14  | 3.98 ±0.73<br>7 4 | 0.79 ±0.01<br>0 7 | 10.63 ±0.187<br>3 | 0.30 ±0.00<br>1 9 | 1.60 ±0.01<br>5 1 | 3.16 ±0.20<br>2 2 | 0.01 ±0.00<br>8 3 | 6.623 ±0.04<br>4   | 0.22 ±0.02<br>7 1 |
| 20  | 4.90 ±0.74<br>2 5 | 1.01 ±0.04<br>7 7 | 10.42 ±0.233<br>8 | 0.36 ±0.00<br>6 9 | 1.52 ±0.00<br>3 6 | 2.49 ±0.56<br>2 2 | 0.02 ±0.00<br>2 1 | 6.961 ±0.07<br>1   | 0.33 ±0.11<br>4 4 |
| 27  | 4.45 ±0.36<br>1 9 | 0.74 ±0.03<br>6 3 | 11.22 ±0.300<br>1 | 0.35 ±0.01<br>0 4 | 1.51 ±0.21<br>7 1 | 1.24 ±0.06<br>0 0 | 0.01 ±0.00<br>7 2 | 6.959 ±0.33<br>1   | 0.40 ±0.04<br>3 1 |
| 35  | 5.17 ±0.54<br>3 4 | 1.18 ±0.05<br>5 1 | 13.50 ±0.302<br>6 | 0.42 ±0.02<br>3 6 | 1.45 ±0.03<br>4 5 | 1.42 ±0.04<br>5 0 | 0.02 ±0.00<br>3 0 | 9.317 ±0.32<br>5   | 0.19 ±0.07<br>2 3 |
| 46  | 5.71 ±0.10<br>3 5 | 1.26 ±0.13<br>9 9 | 23.90 ±0.489<br>1 | 0.45 ±0.02<br>6 3 | 0.88 ±0.00<br>2 0 | 1.03 ±0.17<br>1 4 | 0.02 ±0.00<br>6 4 | 14.75 ±0.33<br>9 8 | 0.26 ±0.07<br>7 8 |

**Table S5.** Effluent ARG abundances (Copy/mL) in the pre-antibiotics, antibiotics loading, and post-antibiotics periods. Abundance and errors respectively represent the mean values and standard deviations calculated from triplicate qPCR results.

| Day | <i>ermF</i>      | <i>ermB</i>      | <i>sul1</i>      | <i>sul2</i>      | <i>int11</i>     | <i>oxa-1</i>     | <i>ampC</i>      | <i>tetO</i>      | <i>tetW</i>      | <i>rpoB</i>      |
|-----|------------------|------------------|------------------|------------------|------------------|------------------|------------------|------------------|------------------|------------------|
| 1   | 1.9E+01 ±3.1E+00 | 6.1E+00 ±1.7E+00 | 3.8E+03 ±8.9E+01 | 1.9E+02 ±6.9E-01 | 4.9E+03 ±5.9E+01 | 4.7E+02 ±1.8E+01 | 4.4E+00 ±1.3E+00 | 1.4E+02 ±1.1E+01 | 3.6E+02 ±3.3E+01 | 5.1E+02 ±4.9E+00 |
| 6   | 1.6E+00 ±2.8E-01 | 5.8E+00 ±1.1E+00 | 2.6E+05 ±8.8E+02 | 1.9E+02 ±1.8E+00 | 7.9E+04 ±9.4E+02 | 5.3E+02 ±2.8E+01 | 1.4E+01 ±7.8E+00 | 3.2E+01 ±3.5E+00 | 4.7E+01 ±8.0E+00 | 5.0E+03 ±1.8E+02 |
| 14  | 3.0E+00 ±5.2E-01 | 6.8E+00 ±1.2E+00 | 3.5E+04 ±1.2E+03 | 6.1E+03 ±3.1E+02 | 2.1E+04 ±3.1E+03 | 6.7E+03 ±3.1E+02 | 2.0E+00 ±4.5E-02 | 7.0E+01 ±6.5E+00 | 1.7E+02 ±5.8E+01 | 2.5E+03 ±1.8E+02 |
| 20  | 9.8E-01 ±1.0E-01 | 9.1E+00 ±3.4E-01 | 9.8E+02 ±6.9E+01 | 7.7E+01 ±1.7E+01 | 5.2E+02 ±7.7E+01 | 3.2E+01 ±1.3E+01 | 2.1E+00 ±1.1E+00 | 2.2E+01 ±2.8E+00 | 9.8E-01 ±0.0E+00 | 8.9E+01 ±1.2E+01 |
| 27  | 6.6E-02 ±2.1E-02 | 7.2E+00 ±6.0E-01 | 1.2E+03 ±1.1E+02 | 1.4E+02 ±5.5E+00 | 7.9E+02 ±9.0E+01 | 3.2E+01 ±7.2E+00 | 2.6E+00 ±1.3E+00 | 1.9E+01 ±3.6E+00 | 1.1E+00 ±1.3E-01 | 7.3E+01 ±4.2E+00 |
| 35  | 1.0E+00 ±4.3E-02 | 1.2E+01 ±2.3E+00 | 2.8E+03 ±2.1E+02 | 9.6E+01 ±9.2E-01 | 2.3E+03 ±4.0E+02 | 8.7E+01 ±1.4E+01 | 1.8E+01 ±1.0E+00 | 2.6E+01 ±9.6E-01 | 2.1E+01 ±3.6E+00 | 1.2E+02 ±1.1E+01 |
| 46  | 8.6E+03 ±1.1E+03 | 1.0E+03 ±8.2E+01 | 1.5E+04 ±1.4E+02 | 6.6E+02 ±4.7E+00 | 1.5E+03 ±1.3E+02 | 5.8E+02 ±2.2E+02 | 0.0E+00 ±0.0E+00 | 8.6E+03 ±7.7E+02 | 2.6E+02 ±2.0E+02 | 2.3E+03 ±1.7E+02 |

**Table S6.** Correlation analysis results between the first 100 most abundant OTUs and ARGs in biomass and effluent of the AnMBR. Correlated ARGs had strong significant correlation ( $p < 0.05$ ; and  $p > 0.7$  or  $p < -0.7$ ) with the assigned OTUs. Green rows show correlation in biomass samples and the yellow rows show correlation in effluent samples.

| OUT    | Kingdom  | Phylum                | Class                      | Order                      | Family                     | Genus                           | Correlated ARGs                    |
|--------|----------|-----------------------|----------------------------|----------------------------|----------------------------|---------------------------------|------------------------------------|
| Otu6   | Bacteria | Bacteroidetes         | Bacteroidetes_unclassified | Bacteroidetes_unclassified | Bacteroidetes_unclassified | Bacteroidetes_unclassified      | ermF, ermB, sul1, sul2, ampC, tetO |
| Otu8   | Bacteria | Bacteroidetes         | Bacteroidetes_unclassified | Bacteroidetes_unclassified | Bacteroidetes_unclassified | Bacteroidetes_unclassified      | int11, oxa-1                       |
| Otu9   | Bacteria | Ignavibacteriae       | Ignavibacteria             | Ignavibacteriales          | Ignavibacteriaceae         | Ignavibacteriaceae_unclassified | ermF, ermB, int11, ampC, oxa-1     |
| Otu15  | Bacteria | Chloroflexi           | Chloroflexi_unclassified   | Chloroflexi_unclassified   | Chloroflexi_unclassified   | Chloroflexi_unclassified        | tetW                               |
| Otu16  | Bacteria | Bacteroidetes         | Bacteroidetes_unclassified | Bacteroidetes_unclassified | Bacteroidetes_unclassified | Bacteroidetes_unclassified      | ermB, sul1, sul2, tetO             |
| Otu32  | Bacteria | Firmicutes            | Clostridia                 | Clostridiales              | Clostridiales_unclassified | Clostridiales_unclassified      | ermF, ermB, sul1, sul2, ampC, tetO |
| Otu33  | Bacteria | Bacteroidetes         | Flavobacteriia             | Flavobacteriales           | Flavobacteriaceae          | Cloacibacterium                 | int11, oxa-1                       |
| Otu35  | Bacteria | Verrucomicrobia       | Subdivision3               | Subdivision3_unclassified  | Subdivision3_unclassified  | Subdivision3_unclassified       | ermF, ermB, sul1, sul2, ampC, tetO |
| Otu45  | Bacteria | Bacteria_unclassified | Bacteria_unclassified      | Bacteria_unclassified      | Bacteria_unclassified      | Bacteria_unclassified           | int11                              |
| Otu46  | Bacteria | Chloroflexi           | Anaerolineae               | Anaerolineales             | Anaerolineaceae            | Anaerolineaceae_unclassified    | int11                              |
| Otu52  | Bacteria | Chloroflexi           | Anaerolineae               | Anaerolineales             | Anaerolineaceae            | Anaerolineaceae_unclassified    | oxa-1, int11                       |
| Otu68  | Bacteria | Bacteria_unclassified | Bacteria_unclassified      | Bacteria_unclassified      | Bacteria_unclassified      | Bacteria_unclassified           | int11                              |
| Otu73  | Bacteria | Chloroflexi           | Anaerolineae               | Anaerolineales             | Anaerolineaceae            | Anaerolineaceae_unclassified    | sul1, tetO                         |
| Otu74  | Bacteria | Proteobacteria        | Deltaproteobacteria        | Syntrophobacterales        | Syntrophaceae              | Smithella                       | int11                              |
| Otu84  | Bacteria | Firmicutes            | Firmicutes_unclassified    | Firmicutes_unclassified    | Firmicutes_unclassified    | Firmicutes_unclassified         | ermF, ermB, sul1, sul2, ampC, tetO |
| Otu93  | Bacteria | Bacteroidetes         | Bacteroidia                | Bacteroidales              | Porphyromonadaceae         | Macellibacteroides              | int11, oxa-1                       |
| Otu97  | Bacteria | Verrucomicrobia       | Subdivision3               | Subdivision3_unclassified  | Subdivision3_unclassified  | Subdivision3_unclassified       | ermB, sul1, sul2, tetO             |
| Otu98  | Bacteria | Chloroflexi           | Anaerolineae               | Anaerolineales             | Anaerolineaceae            | Anaerolineaceae_unclassified    | oxa-1, int11                       |
| Otu99  | Bacteria | Synergistetes         | Synergistia                | Synergistales              | Synergistaceae             | Aminivibrio                     | sul1, tetO                         |
| Otu105 | Bacteria | Chloroflexi           | Anaerolineae               | Anaerolineales             | Anaerolineaceae            | Anaerolineaceae_unclassified    | ermF, ermB, sul1, sul2, ampC, tetO |
| Otu134 | Bacteria | Bacteroidetes         | Bacteroidetes_unclassified | Bacteroidetes_unclassified | Bacteroidetes_unclassified | Bacteroidetes_unclassified      | ermF, ermB, sul1, sul2, ampC, tetO |
| Otu135 | Bacteria | Chloroflexi           | Anaerolineae               | Anaerolineales             | Anaerolineaceae            | Anaerolineaceae_unclassified    | int11                              |

|        |          |                       |                            |                            |                                 |                                 |                  |
|--------|----------|-----------------------|----------------------------|----------------------------|---------------------------------|---------------------------------|------------------|
| Otu168 | Bacteria | Proteobacteria        | Deltaproteobacteria        | Desulfovibrionales         | Desulfovibrionales_unclassified | Desulfovibrionales_unclassified | sul1, tetO       |
| Otu170 | Bacteria | Bacteria_unclassified | Bacteria_unclassified      | Bacteria_unclassified      | Bacteria_unclassified           | Bacteria_unclassified           | sul1, tetO       |
| Otu171 | Bacteria | Bacteroidetes         | Bacteroidia                | Bacteroidales              | Bacteroidaceae                  | Bacteroides                     | sul1, tetO       |
| Otu206 | Bacteria | Ignavibacteriae       | Ignavibacteria             | Ignavibacteriales          | Ignavibacteriaceae              | Ignavibacteriaceae_unclassified | sul2             |
| Otu232 | Bacteria | Bacteria_unclassified | Bacteria_unclassified      | Bacteria_unclassified      | Bacteria_unclassified           | Bacteria_unclassified           | int11, oxa-1     |
| Otu11  | Bacteria | Firmicutes            | Negativicutes              | Selenomonadales            | Veillonellaceae                 | Anaerosinus                     | ermF, ermB, tetO |
| Otu20  | Bacteria | Bacteroidetes         | Bacteroidetes_unclassified | Bacteroidetes_unclassified | Bacteroidetes_unclassified      | Bacteroidetes_unclassified      | sul1, int11      |
| Otu21  | Bacteria | Firmicutes            | Negativicutes              | Selenomonadales            | Veillonellaceae                 | Propionispira                   | ermF, ermB, tetO |
| Otu25  | Bacteria | Bacteria_unclassified | Bacteria_unclassified      | Bacteria_unclassified      | Bacteria_unclassified           | Bacteria_unclassified           | sul1, int11      |
| Otu27  | Bacteria | Proteobacteria        | Epsilonproteobacteria      | Campylobacterales          | Campylobacteraceae              | Arcobacter                      | sul1, int11      |
| Otu48  | Bacteria | Proteobacteria        | Betaproteobacteria         | Rhodocyclales              | Rhodocyclaceae                  | Dechloromonas                   | ermF, ermB, tetO |
| Otu60  | Bacteria | Proteobacteria        | Betaproteobacteria         | Burkholderiales            | Comamonadaceae                  | Comamonadaceae_unclassified     | sul2, oxa-1      |
| Otu66  | Bacteria | Proteobacteria        | Alphaproteobacteria        | Rhodospirillales           | Rhodospirillaceae               | Novispirillum                   | sul1, int11      |
| Otu70  | Bacteria | Proteobacteria        | Gammaproteobacteria        | Pseudomonadales            | Moraxellaceae                   | Acinetobacter                   | sul2, oxa-1      |
| Otu78  | Bacteria | Proteobacteria        | Betaproteobacteria         | Burkholderiales            | Comamonadaceae                  | Comamonas                       | sul1, int11      |
| Otu89  | Bacteria | Bacteroidetes         | Flavobacteriia             | Flavobacteriales           | Flavobacteriaceae               | Flavobacterium                  | sul1, int11      |
| Otu92  | Bacteria | Bacteroidetes         | Bacteroidia                | Bacteroidales              | Bacteroidales_unclassified      | Bacteroidales_unclassified      | tetW             |
| Otu111 | Bacteria | Bacteria_unclassified | Bacteria_unclassified      | Bacteria_unclassified      | Bacteria_unclassified           | Bacteria_unclassified           | sul2, oxa-1      |
| Otu159 | Bacteria | Bacteroidetes         | Bacteroidia                | Bacteroidales              | Porphyromonadaceae              | Acetobacteroides                | sul1, int11      |
| Otu163 | Bacteria | Proteobacteria        | Betaproteobacteria         | Methylophilales            | Methylophilaceae                | Methylophilus                   | sul2, oxa-1      |
| Otu175 | Bacteria | Proteobacteria        | Epsilonproteobacteria      | Campylobacterales          | Campylobacteraceae              | Sulfurospirillum                | tetW             |
| Otu178 | Bacteria | Proteobacteria        | Betaproteobacteria         | Rhodocyclales              | Rhodocyclaceae                  | Rhodocyclaceae_unclassified     | ermF, ermB, tetO |
| Otu184 | Bacteria | Proteobacteria        | Betaproteobacteria         | Burkholderiales            | Comamonadaceae                  | Comamonas                       | ermF, ermB, tetO |
| Otu209 | Bacteria | Proteobacteria        | Deltaproteobacteria        | Desulfobacterales          | Desulfobulbaceae                | Desulfobulbus                   | sul2, oxa-1      |
| Otu247 | Bacteria | Bacteria_unclassified | Bacteria_unclassified      | Bacteria_unclassified      | Bacteria_unclassified           | Bacteria_unclassified           | sul1, int11      |
| Otu264 | Bacteria | Actinobacteria        | Actinobacteria             | Actinomycetales            | Nocardiaceae                    | Rhodococcus                     | sul1, int11      |
| Otu287 | Bacteria | Proteobacteria        | Deltaproteobacteria        | Desulfovibrionales         | Desulfovibrionaceae             | Desulfovibrio                   | sul2, oxa-1      |
| Otu299 | Bacteria | Proteobacteria        | Alphaproteobacteria        | Rhizobiales                | Bradyrhizobiaceae               | Rhodopseudomonas                | ermF, ermB, tetO |
| Otu352 | Bacteria | Proteobacteria        | Alphaproteobacteria        | Caulobacterales            | Caulobacteraceae                | Caulobacter                     | sul1, int11      |
| Otu360 | Bacteria | Bacteroidetes         | Flavobacteriia             | Flavobacteriales           | Cryomorphaceae                  | Cryomorphaceae_unclassified     | sul2, oxa-1      |
| Otu372 | Bacteria | Bacteria_unclassified | Bacteria_unclassified      | Bacteria_unclassified      | Bacteria_unclassified           | Bacteria_unclassified           | sul1, int11      |
| Otu384 | Bacteria | Spirochaetes          | Spirochaetia               | Spirochaetales             | Spirochaetaceae                 | Spirochaetaceae_unclassified    | sul2, oxa-1      |
| Otu387 | Bacteria | Proteobacteria        | Deltaproteobacteria        | Desulfuromonadales         | Geobacteraceae                  | Geobacter                       | tetW             |

|         |          |                       |                       |                                 |                                 |                                 |                  |
|---------|----------|-----------------------|-----------------------|---------------------------------|---------------------------------|---------------------------------|------------------|
| Otu389  | Bacteria | Bacteria_unclassified | Bacteria_unclassified | Bacteria_unclassified           | Bacteria_unclassified           | Bacteria_unclassified           | ermF, ermB, tetO |
| Otu441  | Bacteria | Proteobacteria        | Epsilonproteobacteria | Campylobacterales               | Helicobacteraceae               | Sulfuricurvum                   | sul1, int1       |
| Otu499  | Bacteria | Proteobacteria        | Alphaproteobacteria   | Rhizobiales                     | Bradyrhizobiaceae               | Bosea                           | sul2, oxa-1      |
| Otu501  | Bacteria | Proteobacteria        | Alphaproteobacteria   | Caulobacterales                 | Caulobacteraceae                | Caulobacteraceae_unclassified   | sul1, int1       |
| Otu550  | Bacteria | Bacteroidetes         | Flavobacteriia        | Flavobacteriales                | Flavobacteriaceae               | Chryseobacterium                | sul1, int1       |
| Otu648  | Bacteria | Proteobacteria        | Deltaproteobacteria   | Bdellovibrionales               | Bdellovibrionaceae              | Bdellovibrio                    | sul1, int1       |
| Otu0662 | Bacteria | Proteobacteria        | Betaproteobacteria    | Betaproteobacteria_unclassified | Betaproteobacteria_unclassified | Betaproteobacteria_unclassified | sul2, oxa-1      |
| Otu0745 | Bacteria | Proteobacteria        | Betaproteobacteria    | Rhodocyclales                   | Rhodocyclaceae                  | Zoogloea                        | sul1, int1       |
| Otu0869 | Bacteria | Proteobacteria        | Alphaproteobacteria   | Rhodospirillales                | Rhodospirillaceae               | Novispirillum                   | sul1, int1       |
| Otu1041 | Bacteria | Bacteria_unclassified | Bacteria_unclassified | Bacteria_unclassified           | Bacteria_unclassified           | Bacteria_unclassified           | sul1, int1       |
| Otu1540 | Bacteria | Proteobacteria        | Betaproteobacteria    | Betaproteobacteria_unclassified | Betaproteobacteria_unclassified | Betaproteobacteria_unclassified | sul1, int1       |



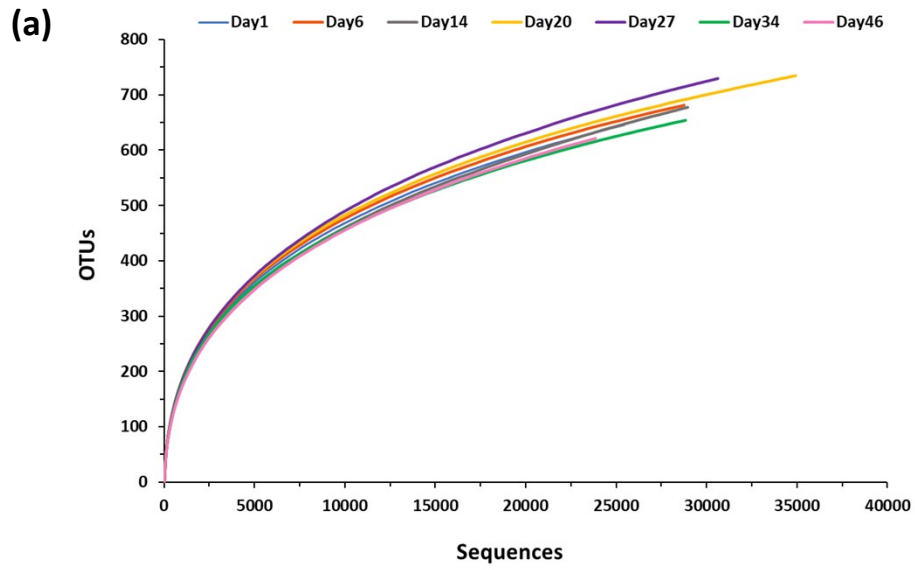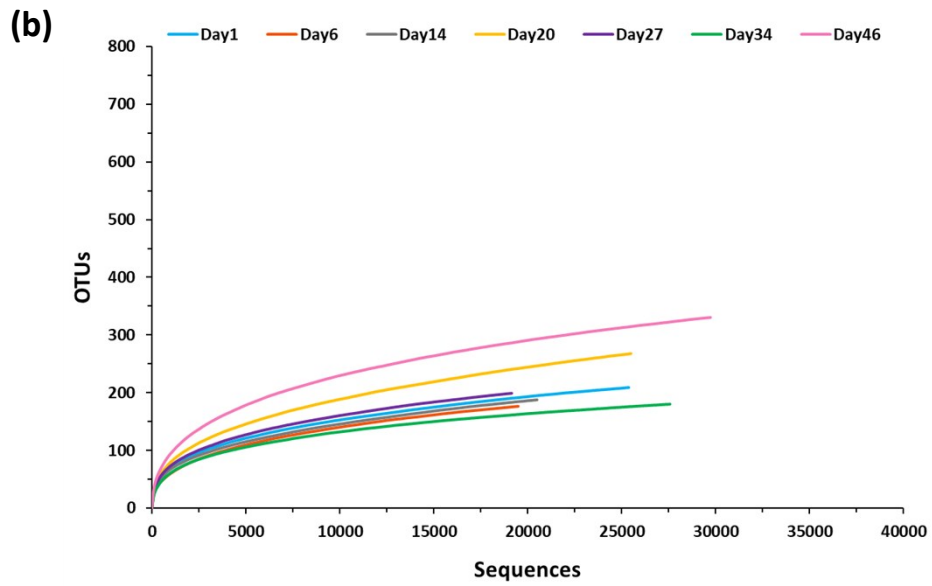

**Figure S1.** Rarefaction curves for (a) biomass and (b) effluent microbial community samples of the AnMBR.

(a)

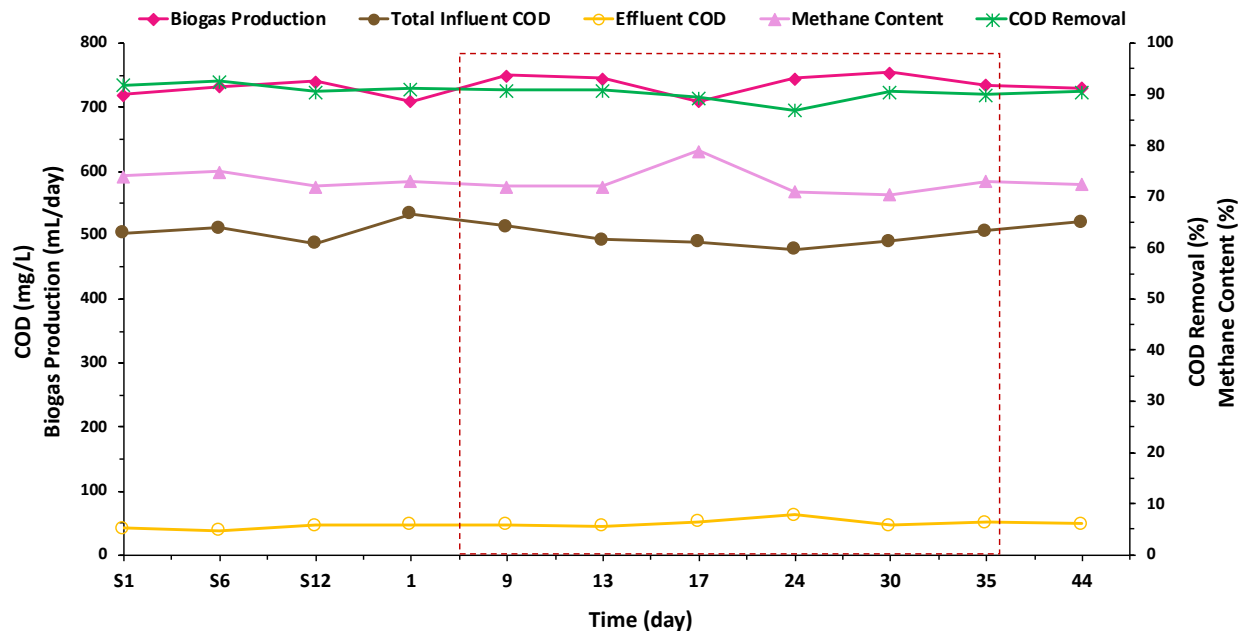

(b)

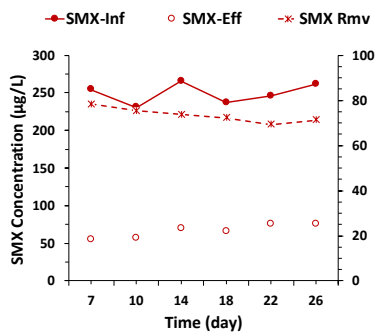

(c)

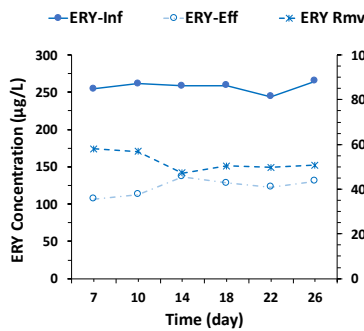

(d)

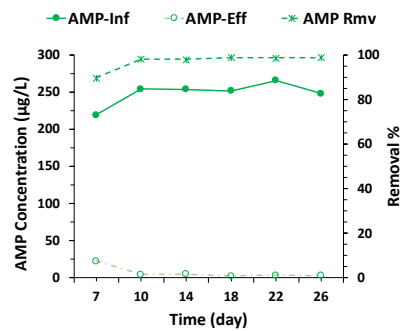

**Figure S2.** Performance of the AnMBR in (a) COD removal and biogas production, and (b) sulfamethoxazole, (c) erythromycin, and (d) ampicillin removal efficiency. In (a), days S1, S6, and S12 represent sampling points during confirmation of steady-state reactor performance. The AnMBR was operated for 48 days prior to the operational period depicted in the above figure. Additional reactor performance data, in which the reactor performed similarly, is provided in our previous paper.<sup>8</sup>

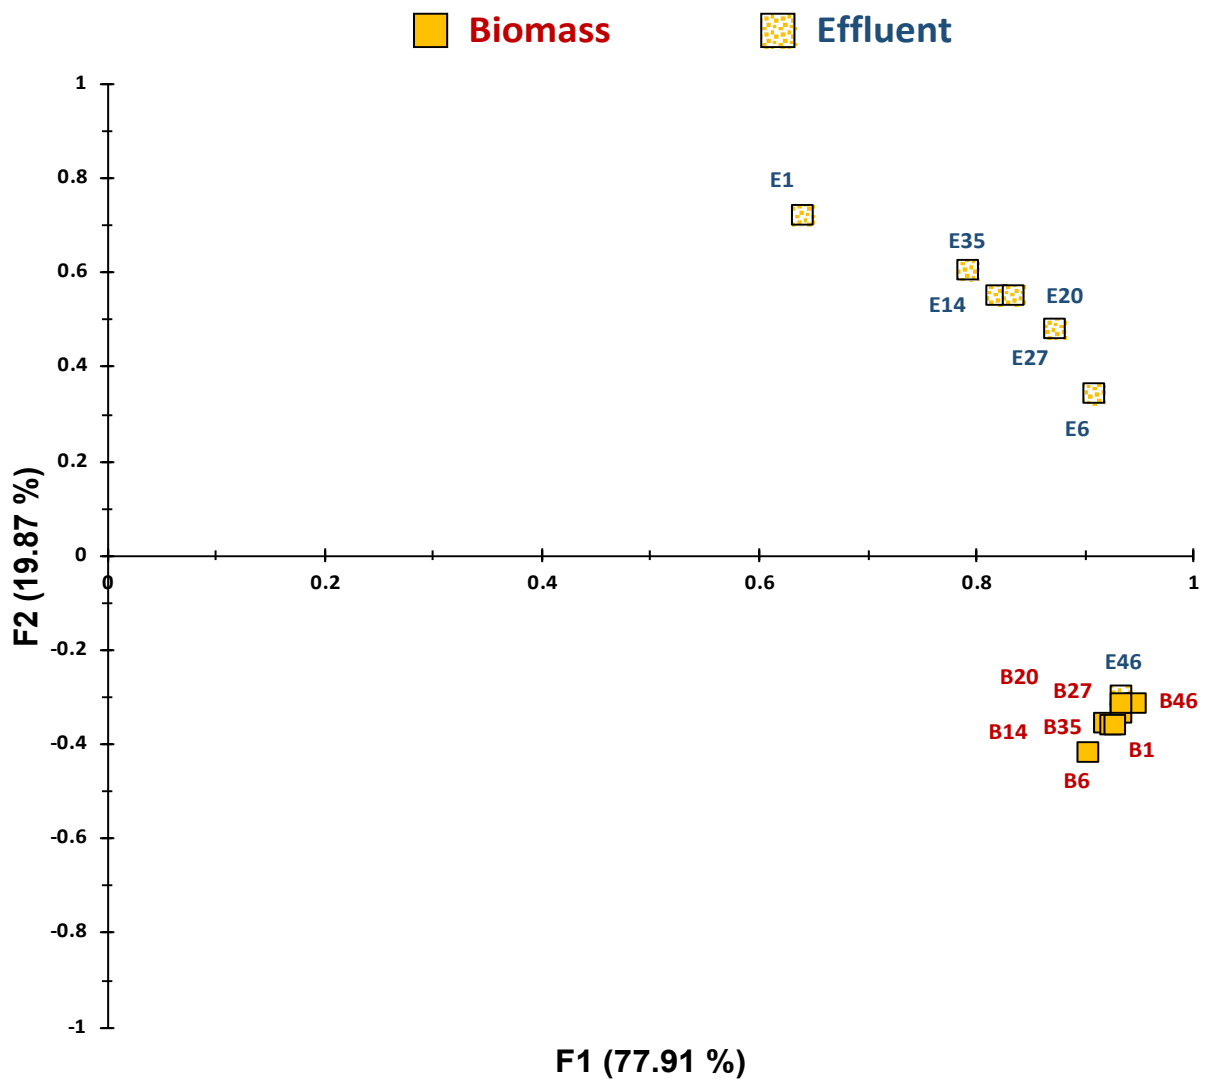

**Figure S3.** PCA of ARG profiles in the biomass and effluent of the AnMBR.

(a)

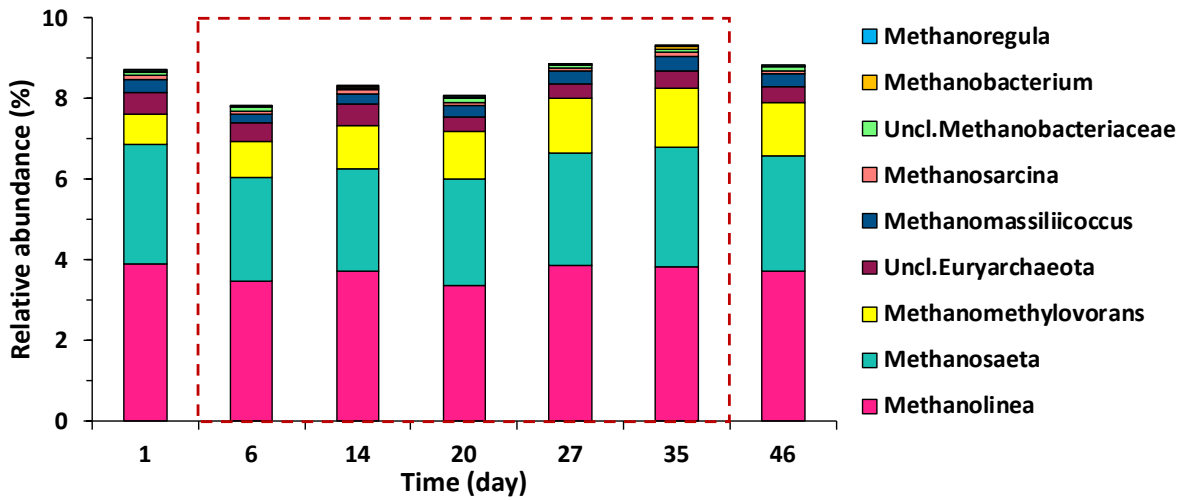

(b)

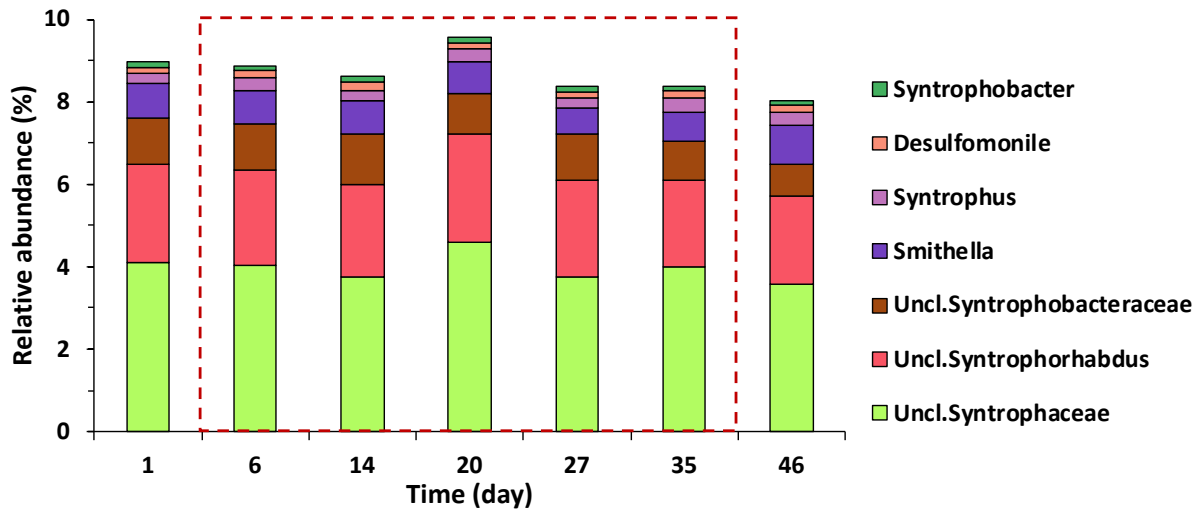

**Figure S4.** Relative abundance of (a) methanogens and (b) syntrophic bacteria in the biomass of the AnMBR throughout the experimental period. Day 1 represents pre-antibiotics period, days 6, 14, 20, 27 and 35 represent antibiotics loading period (area bordered by red dashed line) and day 46 represents post-antibiotics period.

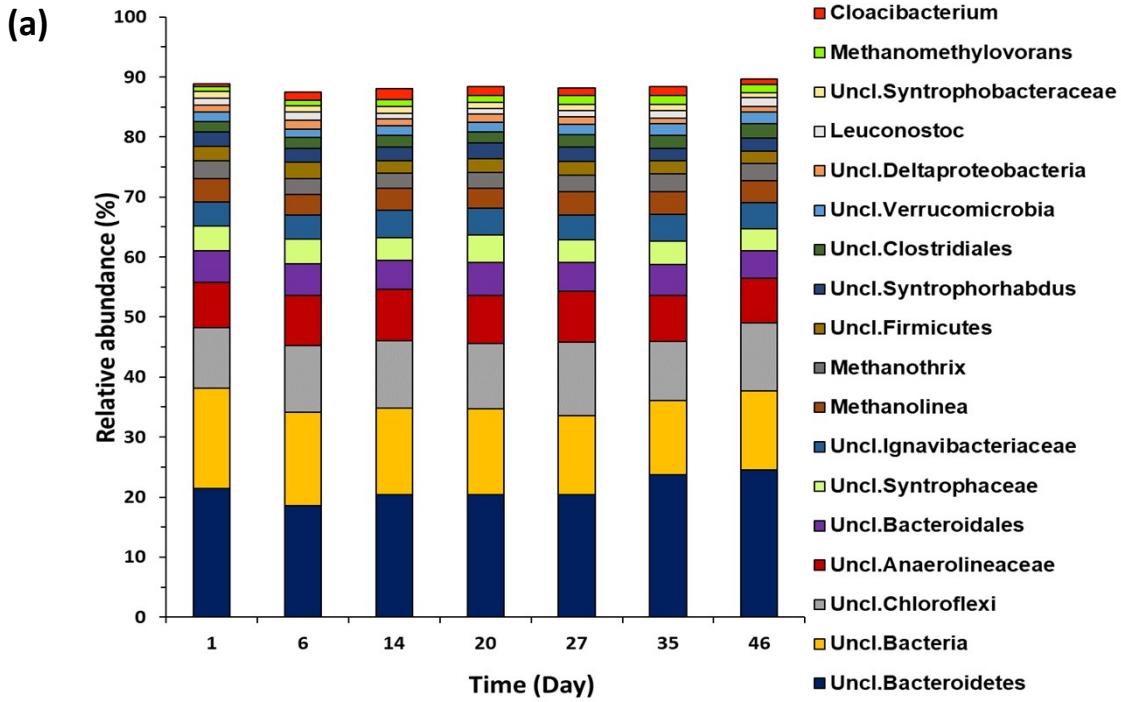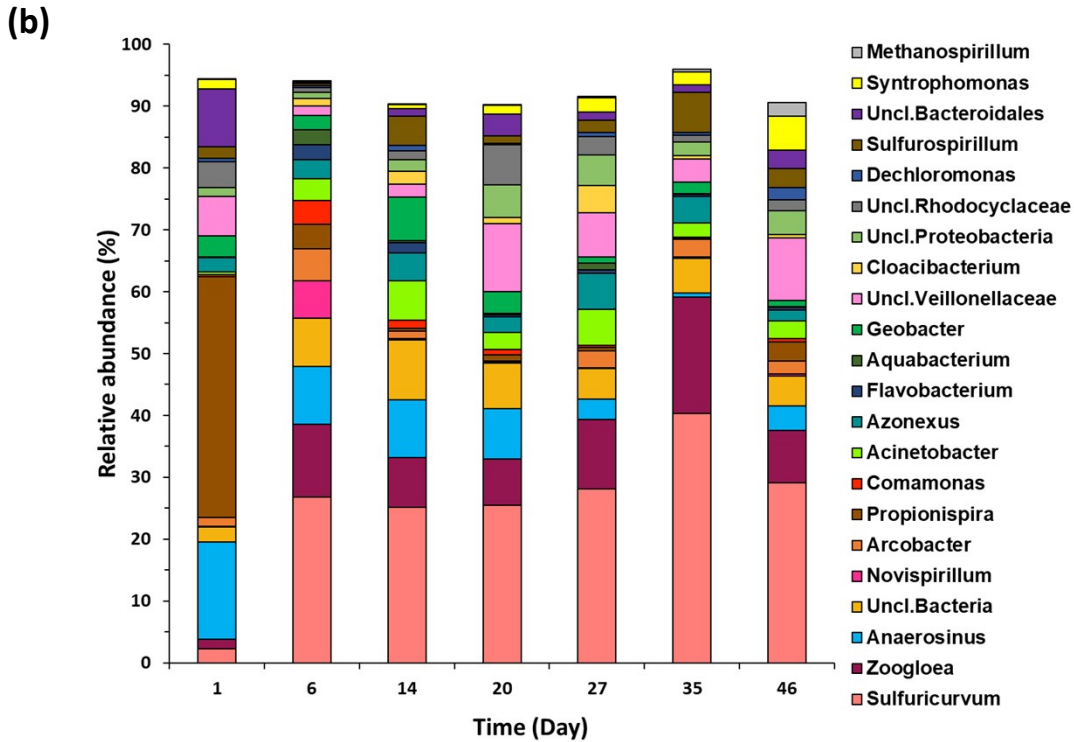

**Figure S5.** Relative abundance of the (a) Biomass and (b) effluent Microbial Community in genus Level throughout the experimental period. Day 1 represents pre-antibiotics period, days 6, 14, 20, 27 and 35 represent antibiotics loading period and day 46 represents post-antibiotics.

### COD Mass Balance in the Reactor

Influent COD:  $453 \pm 32$  mg/L

Effluent COD:  $45 \pm 10$  mg/L

Mixed Liquor Volatile Suspended Solid:  $9.6 \pm 0.3$  g/L

Biogas Methane Production:  $536 \pm 14$  mL/d

Effluent Dissolved Methane:  $112 \pm 5$  mL/d

Wasted Biomass: 10 mL/d

Volume of the Reactor: 5 L

gCOD/gVSS:  $1.42^9$

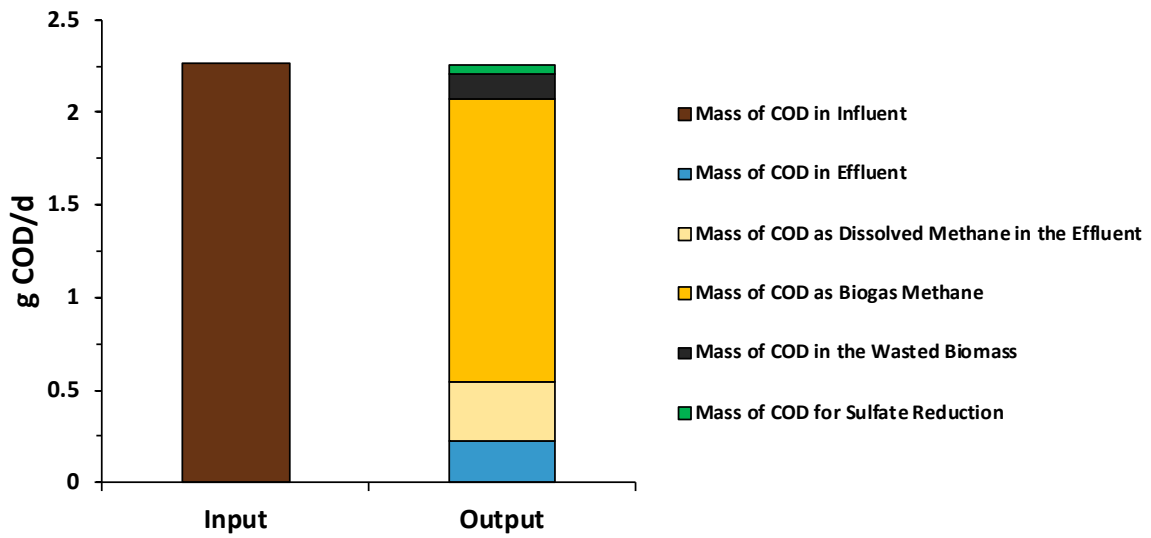

Figure S6. COD mass balance in the reactor.

1. Chen, J.; Yu, Z. T.; Michel, F. C.; Wittum, T.; Morrison, M., Development and application of real-time PCR assays for quantification of erm genes conferring resistance to macrolides-lincosamides-streptogramin B in livestock manure and manure management systems. *Appl. Environ. Microbiol.* **2007**, *73*, (14), 4407-4416.
2. Pei, R.; Kim, S.-C.; Carlson, K. H.; Pruden, A., Effect of river landscape on the sediment concentrations of antibiotics and corresponding antibiotic resistance genes (ARG). *Water Res.* **2006**, *40*, (12), 2427-2435.
3. Barlow, R. S.; Pemberton, J. M.; Desmarchelier, P. M.; Gobius, K. S., Isolation and characterization of integron-containing bacteria without antibiotic selection. *Antimicrobial Agents and Chemotherapy* **2004**, *48*, (3), 838-842.
4. Feria, C.; Ferreira, E.; Correia, J. D.; Goncalves, J.; Canica, M., Patterns and mechanisms of resistance to beta-lactams and beta-lactamase inhibitors in uropathogenic *Escherichia coli* isolated from dogs in Portugal. *J Antimicrob Chemother* **2002**, *49*, (1), 77-85.
5. Szczepanowski, R.; Linke, B.; Krahn, I.; Gartemann, K. H.; Gutzkow, T.; Eichler, W.; Puhler, A.; Schluter, A., Detection of 140 clinically relevant antibiotic-resistance genes in the plasmid metagenome of wastewater treatment plant bacteria showing reduced susceptibility to selected antibiotics. *Microbiology* **2009**, *155*, (Pt 7), 2306-19.
6. Aminov, R. I.; Garrigues-Jeanjean, N.; Mackie, R. I., Molecular ecology of tetracycline resistance: development and validation of primers for detection of tetracycline resistance genes encoding ribosomal protection proteins. *Appl Environ Microb* **2001**, *67*, (1), 22-32.
7. Dahllöf, I.; Baillie, H.; Kjelleberg, S., rpoB-based microbial community analysis avoids limitations inherent in 16S rRNA gene intraspecies heterogeneity. *Appl. Environ. Microbiol.* **2000**, *66*, (8), 3376-3380.
8. Zarei-Baygi A, Harb M, Wang P, Stadler LB, Smith AL. Evaluating Antibiotic Resistance Gene Correlations with Antibiotic Exposure Conditions in Anaerobic Membrane Bioreactors. *Environmental science & technology*. 2019 Feb 27;53(7):3599-609.
9. Grady Jr, CP Leslie, Glen T. Daigger, Nancy G. Love, and Carlos DM Filipe. *Biological wastewater treatment*. CRC press, **2011**.
